# Supplementary material
Source: PubMed Central journal article supplement (PMC4345559)
Supplement: pnas.201416363SI.pdf [file pnas.201416363SI.pdf]

# Supporting Information

Sawashita et al. 10.1073/pnas.1416363112

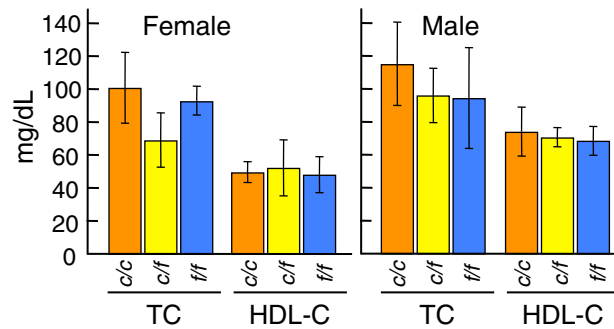

**Fig. S1.** Concentrations of plasma cholesterol in 2-mo-old R1.SPRET-Apoa2<sup>f</sup> mice. Concentrations of plasma total and HDL cholesterol (TC and HDL-C, respectively) were assessed by enzymatic procedures. Each column and bar represents the mean  $\pm$  SD ( $n = 3$  females and 4 males). There were no significant differences in various pair-wise comparisons (Tukey–Kramer method for a multiple comparison).

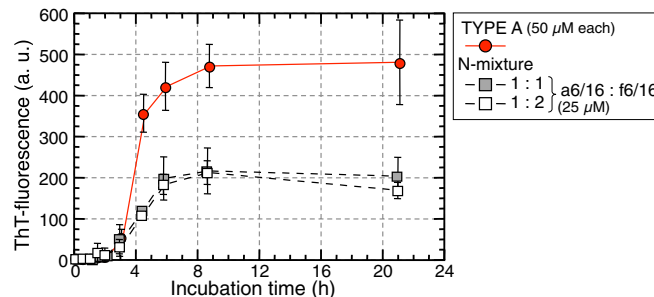

**Fig. S2.** Amyloid fibril formation by type A apolipoprotein (apo) A-II (APOA2A) peptides mixed with N-terminal peptide of type F apoA-II (APOA2F) at various concentrations. Reaction mixtures contained synthetic peptides in the reaction solution that consisted of 50 mM sodium citrate buffer (pH 2.5), 100 mM NaCl, and 5% (vol/vol) dimethyl sulfoxide (DMSO). Mixtures were agitated at 300 rpm at 37 °C, and aliquots were removed for Thioflavin T (ThT) binding assays at arbitrary intervals. ThT-fluorescence intensities of the mixture of amyloidogenic APOA2A peptides (a6/16 + a48/65, TYPE A) (50 μM each) were stable for  $\sim$ 2 h of incubation (the nucleation phase), after which they increased linearly until reaching a plateau phase after  $\sim$ 8 h (the extension phase). ThT intensities increased in a fashion similar to that of the N-mixture at equal concentrations (25 μM a6/16 + 25 μM f6/16 + 50 μM a48/65, N-mixture 1:1). In an N-mixture with f6/16 at a twofold concentration excess of a6/16 (N-mixture 1:2), the ThT-plot was similar to that of N-mixture 1:1. Each symbol and bar represents the mean  $\pm$  SD ( $n = 3$ ). a.u., arbitrary units.

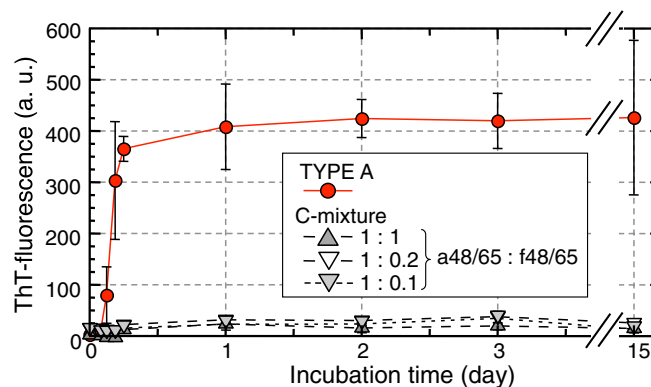

**Fig. S3.** Amyloid fibril formation of APOA2A peptides mixed with C-terminal peptide of APOA2F at various concentrations for reference to Fig. 5E. Concentration of the a48/65 was 25 μM in the reaction mixture. When APOA2A peptides were mixed with f48/65 at one-tenth concentration (C-mixture 1:0.1), ThT intensities did not increase even when incubation was continued for 15 d. Each symbol and bar represents the mean  $\pm$  SD ( $n = 3$ ). a.u., arbitrary units.







**Table S1. Raw data of amyloid deposits in mice injected with AApoAll amyloid fibrils as shown in Fig. 2A**

| After induction, mo                        | <i>Apoa2</i> type | No. | Amyloid grade, average |         |                 |      |       |       |        |      |        |      | AI |
|--------------------------------------------|-------------------|-----|------------------------|---------|-----------------|------|-------|-------|--------|------|--------|------|----|
|                                            |                   |     | Tongue                 | Stomach | Small intestine | Lung | Heart | Liver | Spleen | Skin | Kidney |      |    |
| Strain B6.SPRET- <i>Apoa2</i> <sup>f</sup> |                   |     |                        |         |                 |      |       |       |        |      |        |      |    |
| 3                                          | <i>ala</i>        | 5   | 2.30                   | 1.60    | 0.80            | 1.60 | 0     | 0.20  | 0.20   | 0.20 | 0      | 0.76 |    |
| 3                                          | <i>alf</i>        | 8   | 1.21                   | 0.57    | 0.14            | 0    | 0     | 0.14  | 0.14   | 0    | 0      | 0.31 |    |
| 3                                          | <i>fff</i>        | 4   | 0                      | 0       | 0               | 0    | 0     | 0     | 0      | 0    | 0      | 0    |    |
| 6                                          | <i>ala</i>        | 7   | 3.29                   | 2.43    | 1.64            | 2.79 | 0     | 1.86  | 0.14   | 1.07 | 2.00   | 1.49 |    |
| 6                                          | <i>alf</i>        | 11  | 1.27                   | 0.82    | 0.73            | 0.55 | 0.09  | 0.09  | 0      | 0    | 0      | 0.43 |    |
| 6                                          | <i>fff</i>        | 4   | 0                      | 0       | 0               | 0    | 0     | 0     | 0      | 0    | 0      | 0    |    |
| 9                                          | <i>ala</i>        | 4   | 3.50                   | 3.75    | 2.75            | 3.75 | 1.00  | 2.50  | 1.75   | 2.25 | 2.25   | 2.65 |    |
| 9                                          | <i>alf</i>        | 6   | 1.58                   | 1.08    | 0.67            | 0.50 | 0     | 0.33  | 0      | 0    | 0.17   | 0.52 |    |
| 9                                          | <i>fff</i>        | 4   | 0                      | 0       | 0               | 0    | 0     | 0     | 0      | 0    | 0      | 0    |    |
| Strain R1.SPRET- <i>Apoa2</i> <sup>f</sup> |                   |     |                        |         |                 |      |       |       |        |      |        |      |    |
| 2                                          | <i>c/c</i>        | 6   | 3.17                   | 2.50    | 2.33            | 2.83 | 1.50  | 1.83  | 2.33   | 1.50 | 0.83   | 2.17 |    |
| 2                                          | <i>c/f</i>        | 6   | 1.83                   | 1.33    | 1.17            | 1.50 | 0.83  | 0.83  | 1.00   | 0    | 0.83   | 1.00 |    |
| 2                                          | <i>fff</i>        | 4   | 0                      | 0       | 0               | 0    | 0     | 0     | 0      | 0    | 0      | 0    |    |
| 6                                          | <i>c/c</i>        | 9   | 3.94                   | 3.00    | 3.11            | 3.11 | 2.83  | 3.72  | 4.00   | 2.56 | 3.56   | 3.31 |    |
| 6                                          | <i>c/f</i>        | 9   | 2.94                   | 2.28    | 2.44            | 3.22 | 0.56  | 0.44  | 0.22   | 1.50 | 0      | 1.48 |    |
| 6                                          | <i>fff</i>        | 4   | 0                      | 0       | 0               | 0    | 0     | 0     | 0      | 0    | 0      | 0    |    |

AI, the average of amyloid deposit grades in the tongue, stomach, small intestine, heart, liver, spleen, and skin.

**Table S2. Spontaneous amyloid deposits in R1.SPRET-*Apoa2*<sup>f</sup> mice without injection of AApoAll fibrils**

| <i>Apoa2</i> type | Age, mo | Case/at risk | Amyloid grade, average |         |                 |      |       |       |        |      |        |      | AI |
|-------------------|---------|--------------|------------------------|---------|-----------------|------|-------|-------|--------|------|--------|------|----|
|                   |         |              | Tongue                 | Stomach | Small intestine | Lung | Heart | Liver | Spleen | Skin | Kidney |      |    |
| <i>c/c</i>        | 10      | 6/6          | 2.67                   | 1.83    | 1.83            | 2.33 | 1.33  | 1.33  | 2.33   | 0    | 1.17   | 1.62 |    |
| <i>c/f</i>        | 13      | 2/5          | 0.40                   | 0       | 0.80            | 0.40 | 0.20  | 0     | 0      | 0    | 0      | 0.20 |    |
| <i>fff</i>        | 13      | 0/8          | 0                      | 0       | 0               | 0    | 0     | 0     | 0      | 0    | 0      | 0    |    |

AI, the average of amyloid deposit grades in the tongue, stomach, small intestine, heart, liver, spleen, and skin.

**Table S3. Raw data of amyloid deposits in amyloidosis-susceptible mice injected with AApoAll fibrils as shown in Fig. 8A**

| Treatment    | Case/at risk | Amyloid grade, average |         |                 |      |       |       |        |      |        |      | AI |
|--------------|--------------|------------------------|---------|-----------------|------|-------|-------|--------|------|--------|------|----|
|              |              | Tongue                 | Stomach | Small intestine | Lung | Heart | Liver | Spleen | Skin | Kidney |      |    |
| Vehicle      | 5/5          | 3.00                   | 2.00    | 2.20            | 2.20 | 1.40  | 1.60  | 1.20   | 1.00 | 1.20   | 1.77 |    |
| a48/65       | 4/4          | 2.50                   | 2.00    | 3.25            | 2.50 | 0.75  | 2.00  | 1.75   | 0.75 | 0.25   | 1.86 |    |
| a48/65(N62K) | 6/6          | 2.17                   | 0.83    | 1.67            | 2.00 | 0.33  | 0.17  | 0.17   | 0.33 | 0      | 0.81 |    |

AI, the average of amyloid deposit grades in the tongue, stomach, small intestine, heart, liver, spleen, and skin.

**Table S4. The specific primers for *Apoa2*<sup>f</sup> congenic mice**

| Gene                      | Primer sequences (5'-3')                 |                      |
|---------------------------|------------------------------------------|----------------------|
|                           | Forward                                  | Reverse              |
| <i>Apoa2</i> <sup>a</sup> | <b>G</b> CCTGTTCACTCA <b>A</b> TACTTTCAG | CAGACTAGTTCCTGCTGACC |
| <i>Apoa2</i> <sup>c</sup> | <b>G</b> CCTGTTCACTCAGTACTTTCAG          | CAGACTAGTTCCTGCTGACC |
| <i>Apoa2</i> <sup>f</sup> | <b>A</b> CCCTGTTCACTCAGTACTTTCAT         | CAGACTAGTTCCTGCTGACT |

Bold and colored letters indicate the variant nucleotides among *Apoa2*<sup>a</sup>, *Apoa2*<sup>c</sup>, and *Apoa2*<sup>f</sup> genes. Red letters represent polymorphisms in nucleotide positions of *Apoa2*<sup>f</sup> gene (blue letters).
